# Supplementary material for: Predictive computational phenotyping and biomarker discovery using reference-free genome comparisons
Source: PubMed Central journal article supplement (PMC5037627; doi:10.1186/s12864-016-2889-6), 2016-09-26
Supplement: 12864_2016_2889_MOESM3_ESM.pdf [file 12864_2016_2889_MOESM3_ESM.pdf]

Table S1: A detailed overview of the sequencing data used in this study. For each species, the study accession number, sequencing platforms, number of genomes and a measure of sequence quality (FastQC) are shown.

| Species                | Accession   | Sequencing Platform         | Genomes | FastQC <sup>1</sup> |
|------------------------|-------------|-----------------------------|---------|---------------------|
| <i>C. difficile</i>    | PRJEB11776  | Illumina HiSeq 2500         | 470     | 98.1%               |
| <i>M. tuberculosis</i> | PRJEB7281   | Illumina MiSeq / HiSeq 2500 | 154     | 31.8%               |
| <i>P. aeruginosa</i>   | PRJNA264310 | Illumina MiSeq / HiSeq 2000 | 390     | 64.6%               |
| <i>S. pneumoniae</i>   | PRJEB2632   | Illumina HiSeq 2000         | 681     | 71.8%               |

<sup>1</sup> Proportion of the genomes that passed the FastQC quality control for per base sequence quality.

Table S2: The antibiotic resistance datasets used in this study. For each dataset, the number of genomes and  $k$ -mers, the type of antibiotic susceptibility data (SIR<sup>1</sup> or MIC<sup>2</sup>) and any threshold used to separate the isolates into resistant and sensitive groups are shown. The resistant group (R) was assigned the positive class ( $y = 1$ ) and the sensitive group (S) was assigned the negative class ( $y = 0$ ).

| Dataset                       | Genomes  |             | Antibiotic Susceptibility |              |         |                                      |
|-------------------------------|----------|-------------|---------------------------|--------------|---------|--------------------------------------|
|                               | Examples | $k$ -mers   | Type                      | S            | R       | Threshold Source                     |
| <b><i>C. difficile</i></b>    |          |             |                           |              |         |                                      |
| Azithromycin                  | 462      | 32 752 570  | MIC                       | $\leq 8$     | $> 8$   | Inferred <sup>3</sup>                |
| Ceftriaxone                   | 285      | 25 405 987  | SIR                       | –            | –       | –                                    |
| Clarithromycin                | 462      | 32 752 570  | MIC                       | $\leq 4$     | $> 4$   | Bourgault et al. (2006) <sup>4</sup> |
| Moxifloxacin                  | 462      | 32 752 570  | MIC                       | $\leq 4$     | $> 4$   | Bourgault et al. (2006) <sup>4</sup> |
| <b><i>M. tuberculosis</i></b> |          |             |                           |              |         |                                      |
| Ethambutol                    | 139      | 9 465 489   | SIR                       | –            | –       | –                                    |
| Isoniazid                     | 141      | 9 701 935   | SIR                       | –            | –       | –                                    |
| Pyrazinamide                  | 111      | 8 058 479   | SIR                       | –            | –       | –                                    |
| Rifampicin                    | 141      | 9 701 935   | SIR                       | –            | –       | –                                    |
| Streptomycin                  | 135      | 9 282 080   | SIR                       | –            | –       | –                                    |
| <b><i>P. aeruginosa</i></b>   |          |             |                           |              |         |                                      |
| Amikacin                      | 365      | 116 441 834 | SIR                       | –            | –       | –                                    |
| Doripenem                     | 363      | 122 438 059 | SIR                       | –            | –       | –                                    |
| Levofloxacin                  | 358      | 122 216 859 | SIR                       | –            | –       | –                                    |
| Meropenem                     | 368      | 123 466 989 | SIR                       | –            | –       | –                                    |
| <b><i>S. pneumoniae</i></b>   |          |             |                           |              |         |                                      |
| Benzylpenicillin              | 421      | 8 968 176   | MIC                       | $\leq 0.064$ | $> 2$   | EUCAST <sup>5</sup>                  |
| Erythromycin                  | 556      | 9 666 898   | MIC                       | $\leq 0.25$  | $> 0.5$ | EUCAST <sup>5</sup>                  |
| Tetracycline                  | 324      | 8 657 259   | MIC                       | $\leq 1$     | $> 2$   | EUCAST <sup>5</sup>                  |

<sup>1</sup> Sensitive/Intermediate/Resistant labels that were predefined by the authors of the dataset.

<sup>2</sup> Measures of minimum inhibitory concentration. In this case, a threshold was used to assign SIR labels to the isolates.

<sup>3</sup> No official MIC breakpoints were available. A visual inspection of the MIC distribution showed a clear separation between two groups of strains. The group with the lowest MIC values was deemed sensitive and the other one was deemed resistant.

<sup>4</sup> Bourgault, A. M., Lamothe, F., Loo, V. G., & Poirier, L. (2006). In vitro susceptibility of *Clostridium difficile* clinical isolates from a multi-institutional outbreak in Southern Quebec, Canada. *Antimicrobial agents and chemotherapy*, 50(10), 3473-3475.

<sup>5</sup> The European Committee on Antimicrobial Susceptibility Testing. Breakpoint tables for interpretation of MICs and zone diameters. Version 5.0, 2015.

Table S3: Analysis of overfitting: The training and testing<sup>1</sup> set error rates are shown for the set covering machine (SCM) and support vector machines with linear and polynomial kernels (LinSVM, PolySVM).

| Dataset                       | SCM <sup>2</sup> | LinSVM <sup>3</sup> | PolySVM <sup>3</sup> |
|-------------------------------|------------------|---------------------|----------------------|
| <b><i>C. difficile</i></b>    |                  |                     |                      |
| Azithromycin                  | 0.014 (0.030)    | 0.004 (0.050)       | 0.002 (0.048)        |
| Ceftriaxone                   | 0.042 (0.073)    | 0.008 (0.079)       | 0.010 (0.076)        |
| Clarithromycin                | 0.017 (0.011)    | 0.003 (0.053)       | 0.002 (0.053)        |
| Clindamycin                   | 0.010 (0.021)    | 0.001 (0.039)       | 0.002 (0.039)        |
| Moxifloxacin                  | 0.019 (0.020)    | 0.028 (0.054)       | 0.029 (0.048)        |
| <b><i>M. tuberculosis</i></b> |                  |                     |                      |
| Ethambutol                    | 0.109 (0.179)    | 0.002 (0.215)       | 0.015 (0.221)        |
| Isoniazid                     | 0.014 (0.021)    | 0.004 (0.117)       | 0.011 (0.119)        |
| Pyrazinamide                  | 0.114 (0.318)    | 0.089 (0.382)       | 0.141 (0.382)        |
| Rifampicin                    | 0.013 (0.031)    | 0.000 (0.200)       | 0.001 (0.204)        |
| Streptomycin                  | 0.033 (0.050)    | 0.009 (0.143)       | 0.011 (0.148)        |
| <b><i>P. aeruginosa</i></b>   |                  |                     |                      |
| Amikacin                      | 0.074 (0.175)    | 0.003 (0.184)       | 0.003 (0.179)        |
| Doripenem                     | 0.207 (0.270)    | 0.066 (0.288)       | 0.049 (0.281)        |
| Levofloxacin                  | 0.058 (0.072)    | 0.032 (0.221)       | 0.055 (0.225)        |
| Meropenem                     | 0.226 (0.267)    | 0.052 (0.329)       | 0.047 (0.331)        |
| <b><i>S. pneumoniae</i></b>   |                  |                     |                      |
| Benzylpenicillin              | 0.008 (0.013)    | 0.000 (0.015)       | 0.000 (0.015)        |
| Erythromycin                  | 0.021 (0.037)    | 0.004 (0.046)       | 0.004 (0.047)        |
| Tetracycline                  | 0.010 (0.031)    | 0.004 (0.039)       | 0.007 (0.037)        |

<sup>1</sup> The testing set error rate rates are shown in parentheses.

<sup>2</sup> SCM: the training and testing set error rates are generally similar, indicating that the SVM does not overfit.

<sup>3</sup> LinSVM and PolySVM: the training set error rates are generally much smaller than the testing set error rates. This indicates that the models are overfit to the training data.

Table S4: Average and standard deviation of the sensitivities measured on the testing set for 10 random partitions of the data. Results are shown for the set covering machine (SCM), the CART algorithm (CART),  $L_1$  and  $L_2$  regularized support vector machines (L1SVM, L2SVM), support vector machines with linear and polynomial kernels (LinSVM, PolySVM) and the baseline, which predicts the most abundant class in the training set. The prefix  $\chi^2$  indicates that univariate filtering was used.

| Dataset                       | SCM               | $\chi^2 + \text{CART}$ | $\chi^2 + \text{L1SVM}$ | $\chi^2 + \text{L2SVM}$ | LinSVM            | PolySVM           | Baseline          |
|-------------------------------|-------------------|------------------------|-------------------------|-------------------------|-------------------|-------------------|-------------------|
| <b><i>C. difficile</i></b>    |                   |                        |                         |                         |                   |                   |                   |
| Azithromycin                  | 0.967 $\pm$ 0.046 | 0.863 $\pm$ 0.068      | 0.923 $\pm$ 0.054       | 0.930 $\pm$ 0.055       | 0.939 $\pm$ 0.056 | 0.937 $\pm$ 0.051 | 0.000 $\pm$ 0.000 |
| Ceftriaxone                   | 0.940 $\pm$ 0.038 | 0.916 $\pm$ 0.051      | 0.931 $\pm$ 0.048       | 0.936 $\pm$ 0.050       | 0.956 $\pm$ 0.018 | 0.956 $\pm$ 0.018 | 1.000 $\pm$ 0.000 |
| Clarithromycin                | 0.990 $\pm$ 0.009 | 0.881 $\pm$ 0.047      | 0.907 $\pm$ 0.058       | 0.918 $\pm$ 0.047       | 0.936 $\pm$ 0.029 | 0.930 $\pm$ 0.031 | 0.000 $\pm$ 0.000 |
| Clindamycin                   | 0.872 $\pm$ 0.089 | 0.954 $\pm$ 0.042      | 0.966 $\pm$ 0.036       | 0.886 $\pm$ 0.073       | 0.850 $\pm$ 0.085 | 0.850 $\pm$ 0.085 | 0.000 $\pm$ 0.000 |
| Moxifloxacin                  | 0.952 $\pm$ 0.023 | 0.952 $\pm$ 0.023      | 0.952 $\pm$ 0.023       | 0.920 $\pm$ 0.034       | 0.921 $\pm$ 0.031 | 0.918 $\pm$ 0.031 | 0.000 $\pm$ 0.000 |
| <b><i>M. tuberculosis</i></b> |                   |                        |                         |                         |                   |                   |                   |
| Ethambutol                    | 0.650 $\pm$ 0.200 | 0.661 $\pm$ 0.133      | 0.779 $\pm$ 0.165       | 0.476 $\pm$ 0.106       | 0.572 $\pm$ 0.101 | 0.560 $\pm$ 0.108 | 0.000 $\pm$ 0.000 |
| Isoniazid                     | 0.974 $\pm$ 0.018 | 0.974 $\pm$ 0.018      | 0.969 $\pm$ 0.025       | 0.856 $\pm$ 0.064       | 0.829 $\pm$ 0.060 | 0.832 $\pm$ 0.071 | 1.000 $\pm$ 0.000 |
| Pyrazinamide                  | 0.526 $\pm$ 0.308 | 0.536 $\pm$ 0.254      | 0.465 $\pm$ 0.305       | 0.388 $\pm$ 0.234       | 0.481 $\pm$ 0.251 | 0.513 $\pm$ 0.254 | 0.000 $\pm$ 0.000 |
| Rifampicin                    | 0.962 $\pm$ 0.028 | 0.957 $\pm$ 0.038      | 0.954 $\pm$ 0.043       | 0.663 $\pm$ 0.112       | 0.732 $\pm$ 0.080 | 0.725 $\pm$ 0.088 | 0.000 $\pm$ 0.000 |
| Streptomycin                  | 0.965 $\pm$ 0.052 | 0.966 $\pm$ 0.033      | 0.960 $\pm$ 0.050       | 0.844 $\pm$ 0.068       | 0.826 $\pm$ 0.100 | 0.822 $\pm$ 0.102 | 1.000 $\pm$ 0.000 |
| <b><i>P. aeruginosa</i></b>   |                   |                        |                         |                         |                   |                   |                   |
| Amikacin                      | 0.467 $\pm$ 0.165 | 0.544 $\pm$ 0.090      | 0.517 $\pm$ 0.116       | 0.579 $\pm$ 0.092       | 0.495 $\pm$ 0.060 | 0.486 $\pm$ 0.064 | 0.000 $\pm$ 0.000 |
| Doripenem                     | 0.614 $\pm$ 0.161 | 0.615 $\pm$ 0.081      | 0.644 $\pm$ 0.061       | 0.581 $\pm$ 0.078       | 0.536 $\pm$ 0.116 | 0.483 $\pm$ 0.140 | 0.000 $\pm$ 0.000 |
| Levofloxacin                  | 0.890 $\pm$ 0.033 | 0.879 $\pm$ 0.030      | 0.859 $\pm$ 0.040       | 0.738 $\pm$ 0.038       | 0.727 $\pm$ 0.037 | 0.704 $\pm$ 0.067 | 0.000 $\pm$ 0.000 |
| Meropenem                     | 0.633 $\pm$ 0.063 | 0.663 $\pm$ 0.061      | 0.575 $\pm$ 0.061       | 0.568 $\pm$ 0.057       | 0.509 $\pm$ 0.090 | 0.517 $\pm$ 0.073 | 0.000 $\pm$ 0.000 |
| <b><i>S. pneumoniae</i></b>   |                   |                        |                         |                         |                   |                   |                   |
| Benzylpenicillin              | 0.873 $\pm$ 0.116 | 0.922 $\pm$ 0.077      | 0.927 $\pm$ 0.063       | 0.836 $\pm$ 0.119       | 0.806 $\pm$ 0.156 | 0.806 $\pm$ 0.156 | 0.000 $\pm$ 0.000 |
| Erythromycin                  | 0.891 $\pm$ 0.034 | 0.806 $\pm$ 0.075      | 0.879 $\pm$ 0.046       | 0.885 $\pm$ 0.035       | 0.834 $\pm$ 0.049 | 0.824 $\pm$ 0.060 | 0.000 $\pm$ 0.000 |
| Tetracycline                  | 0.875 $\pm$ 0.096 | 0.871 $\pm$ 0.078      | 0.875 $\pm$ 0.096       | 0.829 $\pm$ 0.112       | 0.779 $\pm$ 0.115 | 0.796 $\pm$ 0.109 | 0.000 $\pm$ 0.000 |

Table S5: Average and standard deviation of the specificities measured on the testing set for 10 random partitions of the data. Results are shown for the set covering machine (SCM), the CART algorithm (CART),  $L_1$  and  $L_2$  regularized support vector machines (L1SVM, L2SVM), support vector machines with linear and polynomial kernels (LinSVM, PolySVM) and the baseline, which predicts the most abundant class in the training set. The prefix  $\chi^2$  indicates that univariate filtering was used.

| Dataset                       | SCM               | $\chi^2 + \text{CART}$ | $\chi^2 + \text{L1SVM}$ | $\chi^2 + \text{L2SVM}$ | LinSVM            | PolySVM           | Baseline          |
|-------------------------------|-------------------|------------------------|-------------------------|-------------------------|-------------------|-------------------|-------------------|
| <b><i>C. difficile</i></b>    |                   |                        |                         |                         |                   |                   |                   |
| Azithromycin                  | 0.973 $\pm$ 0.021 | 0.954 $\pm$ 0.032      | 0.947 $\pm$ 0.029       | 0.955 $\pm$ 0.029       | 0.959 $\pm$ 0.022 | 0.964 $\pm$ 0.025 | 1.000 $\pm$ 0.000 |
| Ceftriaxone                   | 0.904 $\pm$ 0.093 | 0.812 $\pm$ 0.127      | 0.874 $\pm$ 0.077       | 0.816 $\pm$ 0.060       | 0.845 $\pm$ 0.067 | 0.855 $\pm$ 0.066 | 0.000 $\pm$ 0.000 |
| Clarithromycin                | 0.989 $\pm$ 0.012 | 0.969 $\pm$ 0.031      | 0.963 $\pm$ 0.022       | 0.959 $\pm$ 0.019       | 0.956 $\pm$ 0.019 | 0.961 $\pm$ 0.019 | 1.000 $\pm$ 0.000 |
| Clindamycin                   | 0.995 $\pm$ 0.009 | 0.994 $\pm$ 0.012      | 0.994 $\pm$ 0.015       | 0.993 $\pm$ 0.009       | 0.978 $\pm$ 0.017 | 0.978 $\pm$ 0.017 | 1.000 $\pm$ 0.000 |
| Moxifloxacin                  | 0.998 $\pm$ 0.004 | 0.998 $\pm$ 0.004      | 0.998 $\pm$ 0.004       | 0.971 $\pm$ 0.023       | 0.961 $\pm$ 0.026 | 0.973 $\pm$ 0.025 | 1.000 $\pm$ 0.000 |
| <b><i>M. tuberculosis</i></b> |                   |                        |                         |                         |                   |                   |                   |
| Ethambutol                    | 0.918 $\pm$ 0.081 | 0.901 $\pm$ 0.098      | 0.880 $\pm$ 0.069       | 0.951 $\pm$ 0.060       | 0.909 $\pm$ 0.052 | 0.906 $\pm$ 0.054 | 1.000 $\pm$ 0.000 |
| Isoniazid                     | 0.985 $\pm$ 0.024 | 0.984 $\pm$ 0.035      | 1.000 $\pm$ 0.000       | 0.896 $\pm$ 0.062       | 0.957 $\pm$ 0.040 | 0.953 $\pm$ 0.044 | 0.000 $\pm$ 0.000 |
| Pyrazinamide                  | 0.776 $\pm$ 0.150 | 0.704 $\pm$ 0.134      | 0.775 $\pm$ 0.142       | 0.818 $\pm$ 0.140       | 0.706 $\pm$ 0.267 | 0.694 $\pm$ 0.267 | 1.000 $\pm$ 0.000 |
| Rifampicin                    | 0.977 $\pm$ 0.026 | 0.980 $\pm$ 0.026      | 0.985 $\pm$ 0.025       | 0.925 $\pm$ 0.067       | 0.862 $\pm$ 0.049 | 0.858 $\pm$ 0.050 | 1.000 $\pm$ 0.000 |
| Streptomycin                  | 0.933 $\pm$ 0.048 | 0.928 $\pm$ 0.054      | 0.952 $\pm$ 0.048       | 0.881 $\pm$ 0.076       | 0.892 $\pm$ 0.078 | 0.887 $\pm$ 0.082 | 0.000 $\pm$ 0.000 |
| <b><i>P. aeruginosa</i></b>   |                   |                        |                         |                         |                   |                   |                   |
| Amikacin                      | 0.928 $\pm$ 0.048 | 0.866 $\pm$ 0.056      | 0.900 $\pm$ 0.032       | 0.911 $\pm$ 0.041       | 0.906 $\pm$ 0.038 | 0.916 $\pm$ 0.034 | 1.000 $\pm$ 0.000 |
| Doripenem                     | 0.800 $\pm$ 0.069 | 0.809 $\pm$ 0.050      | 0.793 $\pm$ 0.033       | 0.806 $\pm$ 0.035       | 0.813 $\pm$ 0.047 | 0.847 $\pm$ 0.054 | 1.000 $\pm$ 0.000 |
| Levofloxacin                  | 0.960 $\pm$ 0.030 | 0.963 $\pm$ 0.028      | 0.963 $\pm$ 0.033       | 0.829 $\pm$ 0.027       | 0.822 $\pm$ 0.037 | 0.835 $\pm$ 0.042 | 1.000 $\pm$ 0.000 |
| Meropenem                     | 0.800 $\pm$ 0.041 | 0.790 $\pm$ 0.044      | 0.740 $\pm$ 0.068       | 0.746 $\pm$ 0.064       | 0.783 $\pm$ 0.059 | 0.775 $\pm$ 0.053 | 1.000 $\pm$ 0.000 |
| <b><i>S. pneumoniae</i></b>   |                   |                        |                         |                         |                   |                   |                   |
| Benzylpenicillin              | 0.997 $\pm$ 0.005 | 0.994 $\pm$ 0.010      | 0.994 $\pm$ 0.006       | 1.000 $\pm$ 0.000       | 1.000 $\pm$ 0.000 | 1.000 $\pm$ 0.000 | 1.000 $\pm$ 0.000 |
| Erythromycin                  | 0.976 $\pm$ 0.010 | 0.978 $\pm$ 0.010      | 0.972 $\pm$ 0.009       | 0.971 $\pm$ 0.013       | 0.974 $\pm$ 0.011 | 0.974 $\pm$ 0.011 | 1.000 $\pm$ 0.000 |
| Tetracycline                  | 0.982 $\pm$ 0.010 | 0.982 $\pm$ 0.010      | 0.980 $\pm$ 0.010       | 0.980 $\pm$ 0.010       | 0.983 $\pm$ 0.012 | 0.984 $\pm$ 0.010 | 1.000 $\pm$ 0.000 |

Table S6: Average and standard deviation of the error rates measured on the testing set for 10 random partitions of the data. Results are shown for the set covering machine (SCM), the CART algorithm (CART),  $L_1$  and  $L_2$  regularized support vector machines (L1SVM, L2SVM), support vector machines with linear and polynomial kernels (LinSVM, PolySVM) and the baseline, which predicts the most abundant class in the training set. The prefix  $\chi^2$  indicates that univariate filtering was used.

| Dataset                       | SCM               | $\chi^2 + \text{CART}$ | $\chi^2 + \text{L1SVM}$ | $\chi^2 + \text{L2SVM}$ | LinSVM            | PolySVM           | Baseline          |
|-------------------------------|-------------------|------------------------|-------------------------|-------------------------|-------------------|-------------------|-------------------|
| <b><i>C. difficile</i></b>    |                   |                        |                         |                         |                   |                   |                   |
| Azithromycin                  | 0.030 $\pm$ 0.023 | 0.086 $\pm$ 0.020      | 0.064 $\pm$ 0.029       | 0.056 $\pm$ 0.026       | 0.050 $\pm$ 0.025 | 0.048 $\pm$ 0.023 | 0.446 $\pm$ 0.027 |
| Ceftriaxone                   | 0.073 $\pm$ 0.035 | 0.117 $\pm$ 0.032      | 0.087 $\pm$ 0.028       | 0.102 $\pm$ 0.033       | 0.079 $\pm$ 0.028 | 0.076 $\pm$ 0.028 | 0.306 $\pm$ 0.031 |
| Clarithromycin                | 0.011 $\pm$ 0.006 | 0.070 $\pm$ 0.011      | 0.062 $\pm$ 0.020       | 0.059 $\pm$ 0.020       | 0.053 $\pm$ 0.013 | 0.053 $\pm$ 0.013 | 0.446 $\pm$ 0.027 |
| Clindamycin                   | 0.021 $\pm$ 0.010 | 0.011 $\pm$ 0.008      | 0.009 $\pm$ 0.011       | 0.021 $\pm$ 0.013       | 0.039 $\pm$ 0.010 | 0.039 $\pm$ 0.010 | 0.136 $\pm$ 0.026 |
| Moxifloxacin                  | 0.020 $\pm$ 0.008 | 0.020 $\pm$ 0.008      | 0.020 $\pm$ 0.008       | 0.048 $\pm$ 0.013       | 0.054 $\pm$ 0.019 | 0.048 $\pm$ 0.015 | 0.390 $\pm$ 0.024 |
| <b><i>M. tuberculosis</i></b> |                   |                        |                         |                         |                   |                   |                   |
| Ethambutol                    | 0.179 $\pm$ 0.056 | 0.185 $\pm$ 0.034      | 0.153 $\pm$ 0.045       | 0.221 $\pm$ 0.057       | 0.215 $\pm$ 0.043 | 0.221 $\pm$ 0.045 | 0.351 $\pm$ 0.071 |
| Isoniazid                     | 0.021 $\pm$ 0.016 | 0.021 $\pm$ 0.013      | 0.017 $\pm$ 0.012       | 0.125 $\pm$ 0.038       | 0.117 $\pm$ 0.033 | 0.119 $\pm$ 0.032 | 0.421 $\pm$ 0.064 |
| Pyrazinamide                  | 0.318 $\pm$ 0.104 | 0.371 $\pm$ 0.073      | 0.353 $\pm$ 0.066       | 0.342 $\pm$ 0.067       | 0.382 $\pm$ 0.108 | 0.382 $\pm$ 0.105 | 0.347 $\pm$ 0.065 |
| Rifampicin                    | 0.031 $\pm$ 0.017 | 0.031 $\pm$ 0.021      | 0.031 $\pm$ 0.021       | 0.196 $\pm$ 0.052       | 0.200 $\pm$ 0.033 | 0.204 $\pm$ 0.033 | 0.452 $\pm$ 0.070 |
| Streptomycin                  | 0.050 $\pm$ 0.045 | 0.052 $\pm$ 0.029      | 0.043 $\pm$ 0.046       | 0.137 $\pm$ 0.040       | 0.143 $\pm$ 0.050 | 0.148 $\pm$ 0.054 | 0.435 $\pm$ 0.049 |
| <b><i>P. aeruginosa</i></b>   |                   |                        |                         |                         |                   |                   |                   |
| Amikacin                      | 0.175 $\pm$ 0.032 | 0.206 $\pm$ 0.042      | 0.187 $\pm$ 0.030       | 0.164 $\pm$ 0.030       | 0.184 $\pm$ 0.017 | 0.179 $\pm$ 0.018 | 0.216 $\pm$ 0.033 |
| Doripenem                     | 0.270 $\pm$ 0.038 | 0.261 $\pm$ 0.039      | 0.261 $\pm$ 0.028       | 0.275 $\pm$ 0.034       | 0.288 $\pm$ 0.028 | 0.281 $\pm$ 0.022 | 0.359 $\pm$ 0.026 |
| Levofloxacin                  | 0.072 $\pm$ 0.017 | 0.076 $\pm$ 0.016      | 0.085 $\pm$ 0.019       | 0.212 $\pm$ 0.019       | 0.221 $\pm$ 0.016 | 0.225 $\pm$ 0.017 | 0.463 $\pm$ 0.028 |
| Meropenem                     | 0.267 $\pm$ 0.014 | 0.261 $\pm$ 0.022      | 0.328 $\pm$ 0.032       | 0.327 $\pm$ 0.042       | 0.329 $\pm$ 0.026 | 0.331 $\pm$ 0.022 | 0.404 $\pm$ 0.024 |
| <b><i>S. pneumoniae</i></b>   |                   |                        |                         |                         |                   |                   |                   |
| Benzylpenicillin              | 0.013 $\pm$ 0.009 | 0.012 $\pm$ 0.010      | 0.011 $\pm$ 0.009       | 0.013 $\pm$ 0.011       | 0.015 $\pm$ 0.013 | 0.015 $\pm$ 0.013 | 0.073 $\pm$ 0.016 |
| Erythromycin                  | 0.037 $\pm$ 0.009 | 0.047 $\pm$ 0.010      | 0.041 $\pm$ 0.011       | 0.042 $\pm$ 0.009       | 0.046 $\pm$ 0.008 | 0.047 $\pm$ 0.009 | 0.142 $\pm$ 0.023 |
| Tetracycline                  | 0.031 $\pm$ 0.015 | 0.029 $\pm$ 0.008      | 0.032 $\pm$ 0.018       | 0.037 $\pm$ 0.012       | 0.039 $\pm$ 0.011 | 0.037 $\pm$ 0.012 | 0.106 $\pm$ 0.033 |
